# Supplementary material
Source: publisher site journal article supplement (https://www.dovepress.com/article/509931)
Supplement: Supplementary file 1 [file 509931+Supplementary+Material.docx]

# Supplemental Material 1

## Supplementary materials and methods

**PUFA metabolites LC-MS/MS measurements**

PUFA metabolites were extracted from the supernatant or the cell pellets following the methods previously described 1. PGE2, 15d-PGJ2, PGD2 were quantified. To simultaneously separate lipids of interest and three deuterated internal standards (5-HETEd8, LxA4d4 and LtB4d4), LC-MS/MS analysis was performed on an ultra-high-performance liquid chromatography system (UHPLC; Agilent LC1290 Infinity) coupled to an Agilent 6460 triple quadrupole MS (Agilent Technologies) equipped with electrospray ionization operating in negative mode. Reverse-phase UHPLC was performed using a ZorBAX SB-C18 column (Agilent Technologies) with a gradient elution. The mobile phases consisted of water, acetonitrile (ACN), and formic acid (FA) [75:25:0.1 (v/v/v)] (solution A) and ACN and FA [100:0.1 (v/v)] (solution B). The linear gradient was as follows: 0% solution B at 0 min, 85% solution B at 8.5 min, 100% solution B at 9.5 min, 100% solution B at 10.5 min, and 0% solution B at 12 min. The flow rate was 0.35 ml/min. The autosampler was set at 5°C, and the injection volume was 5 µL. Data were acquired in multiple reaction monitoring (MRM) mode with optimized conditions. Peak detection, integration, and quantitative analysis were performed with MassHunter Quantitative analysis software (Agilent Technologies). For each standard, calibration curves were built using 10 solutions at concentrations ranging from 0.95 to 500 ng/ml. A linear regression with a weight factor of 1/X was applied for each compound. The limit of detection (LOD) and the limit of quantification (LOQ) were determined for the 28 compounds using signal-to-noise (S/N) ratios. The LOD corresponded to the lowest concentration leading to an S/N value >3, and LOQ corresponded to the lowest concentration leading to an S/N value >10. All values less than the LOQ were not considered. Blank samples were evaluated, and their injection showed no interference (no peak detected), during the analysis.

1. Le Faouder P, Baillif V, Spreadbury I, et al. LC-MS/MS method for rapid and concomitant quantification of pro-inflammatory and pro-resolving polyunsaturated fatty acid metabolites. *J Chromatogr B Analyt Technol Biomed Life Sci.* 2013;932:123-133.

## Reagent list

| *REAGENT* | *SOURCE* | *IDENTIFIER* |
| --- | --- | --- |
| Antibodies | | |
| Mouse Anti-Human CD117 (c-Kit) BUV395 | BD Biosciences | Cat#745733; RRID:AB_2743207 |
| Mouse Anti-Human CD117 BV421 | BD Biosciences | Cat# 563856, RRID:AB_2738452 |
| Mouse anti-Human CD117 PE-Cy7 | BioLegend | Cat# 313212, RRID:AB_893222 |
| Mouse anti Human IL17A FITC | Thermo Fisher Scientific | Cat# 11-7179-42, RRID:AB_10805390 |
| Mouse anti- Human IL17A BV510 | Biolegend | Cat# 512330, RRID:AB_2562745 |
| Mouse anti Human IFN-gamma PE | Biolegend | Cat# 502509, RRID:AB_315234 |
| Mouse anti Human IFN-gamma FITC | BD Biosciences | Cat# 554700, RRID:AB_395517 |
| Mouse anti Human IFN-gamma BV421 | BD Biosciences | Cat# 562988, RRID:AB_2737934 |
| Mouse anti Human IL-22 PE-cy7 | Thermo Fisher Scientific | Cat# 25-7229-42, RRID:AB_10853346 |
| Mouse anti-Human IL-4 APC | Biolegend | Cat# 500714, RRID:AB_1877159 |
| Mouse anti Human CD25 Pe-Cy5 | BD Biosciences | Cat# 555433, RRID:AB_395827 |
| Mouse anti Human CD127 BV786 | BD Biosciences | Cat# 563324, RRID:AB_2738138 |
| Mouse anti-Human FoxP3 A488 | BD Biosciences | Cat# 560047, RRID:AB_1645349 |
| Mouse anti-Human LAP PE | BD Biosciences | Cat# 562260, RRID:AB_10895568 |
| Rat anti Human GM-CSF PERCP-Cy5.5 | BD Biosciences | Cat# 562258, RRID:AB_11154230 |
| Mouse anti-Human Granzyme B Alexa Fluor 700 | BD Biosciences | Cat# 560213, RRID:AB_1645453 |
| Mouse anti-Human CD4 | BioLegend | Cat# 344604, RRID:AB_1937227 |
| Mouse (IgG1) anti Human-Tryptase | Agilent | Cat# M7052, RRID:AB_2206478 |
| Rabbit Anti-IL-1 beta antibody | Abcam | Cat# ab9722, RRID:AB_308765 |
| Mouse anti-Chymase | Millipore | Cat# MAB1254, RRID:AB_2083625 |
| Goat anti-Human CD4 | R and D Systems | Cat# AF-379-NA, RRID:AB_354469 |
| Rabbit anti-Human Cleaved-IL-1 | Cell Signaling Technology | Cat# 83186, RRID:AB_2800010 |
| Rabbit anti-Cox2 | Cell Signaling Technology | Cat# 13596, RRID:AB_2798270 |
| Donkey anti-Rabbit IgG (H+L) Highly Cross-Adsorbed Secondary Antibody, Alexa Fluor 555 | Thermo Fisher Scientific | Cat# A-31572, RRID:AB_162543 |
| Donkey anti-Mouse IgG (H+L) Highly Cross-Adsorbed Secondary Antibody, Alexa Fluor 647 | Thermo Fisher Scientific | Cat# A-31571, RRID:AB_162542 |
| Donkey anti-Goat IgG (H+L) Cross-Adsorbed Secondary Antibody, Alexa Fluor 488 | Thermo Fisher Scientific | Cat# A-11055, RRID:AB_2534102 |
| AF555, Donkey anti-rabbit IgG | Invitrogen | Cat# A32794; RRID: AB_2762834 ; |
| AF488, Goat anti-rat IgG | Fisher Scientific | Cat# A11006; RRID: AB_2534074 |
| IgG rabbit anti-human CD3Ɛ | Diagnostic Biosystems | Cat# RMAB005; RRID: AB_2860564; clone: SP7 |
| Biological Samples |  |  |
| Formalin-fixed paraffin embedded (FFPE) colon tissues from Crohn and healthy patients. | Biological Resource Centre (CRB)-CHU Toulouse (DC 2019-3464; AC-2008-820) | N/A |
| Buffy Coat | Etablissement français du sang | N/A |
| Chemicals | | |
| eBioscience™ Fixable Viability Dye eFluor™ 780 | Thermo Fisher Scientific | 65-0865-18 |
| Protein Transport Inhibitor (Containing Brefeldin A) | BD Biosciences | Cat#555029 |
| Protein Transport Inhibitor (Containing Monensin) | BD Biosciences | Cat#554724 |
| CellTrace™ Violet Cell Proliferation Kit | Thermo Fisher Scientific | CatC34571 |
| Phorbol 12-myristate 13-acetate | Sigma-Aldrich | Cat# P8139 |
| Ionomycin calcium salt from Streptomyces conglobatus | Sigma-Aldrich | Cat# I0634 |
| Human FoxP3 Buffer Set | BD Biosciences | Cat# 560098 |
| Indometacin | Sigma-Aldrich | Cat# I7378 |
| Recombinant Human IL-3 | PeproTech | Cat#200-03 |
| L-902,688 | Cayman Chemical | Cat#10007712 |
| Butaprost | Cayman Chemical | Cat# 13740 |
| Sulprostone | Cayman Chemical | Cat#14765 |
| Recombinant Human IL-6 | PeproTech | Cat#200-06 |
| Recombinant Human IL-1RA (Animal-Free) | Biolegend | Cat# 714406 |
| Dynabeads™ Human T-Activator CD3/CD28 for T Cell Expansion and Activation | Life Technologies | Cat#11131D |
| Prostaglandin E2 | Cayman Chemical | Cat# 14010 |
| Prostaglandin d2 | Cayman Chemical | Cat# 12010 |
| 15-deoxy-Δ12,14-Prostaglandin J2 | Cayman Chemical | Cat# 18570 |
| Citrate Buffer, pH 6.0, 10×, Antigen Retriever | Sigma-Aldrich | Cat# C9999 |
| DAPI | Thermofisher | Cat# D1306 |
| Dextran sulfate sodium | MP biomedicals | Cat# Q8758  Lot 160110 |
| Kits | | |
| SuperScript™ IV VILO™ Master Mix with ezDNase™ Enzyme | Thermo Fisher Scientific | Cat# 11766050 |
| Master Mix Fast Advanced TaqMan™ | Thermo Fisher Scientific | Cat#4444557 |
| EasySep™ Human Memory CD4+ T Cell Enrichment Kit | Stemcell Technologies | Cat#19157 |
| EasySep™ Human Whole Blood CD34 Positive Selection Kit | Stemcell Technologies | Cat#18086A |
| EasySep™ Human CD4+CD127lowCD25+ Regulatory T Cell Isolation Kit | Stemcell Technologies | Cat#18063 |
| LEGENDplex™ HU Th Cytokine Panel (12-plex) | Biolegend | Cat# 741028 |
| Oligonucleotides | | |
| FOXP3 (Hs01085834_m1) | Life Technologies | Cat# 4331182 |
| TBX21 (Hs00894392_m1) | Life Technologies | Cat# 4331182 |
| GATA3 (Hs00231122_m1) | Life Technologies | Cat# 4331182 |
| RORC (Hs01076112_m1) | Life Technologies | Cat# 4331182 |
| Software | | |
| GraphPad Prism 9 | graphpad.com | N/A |
| Flowjo 10.0 | Flowjo.com |  |
| R (4.2.2) | r-project.org |  |
| Zen | Carl Zeiss Microscopy |  |
| ImageJ | ImageJ |  |
| StepOne Software V2.3 | Thermo Fisher Scientific |  |

**Supplementary figures**

**
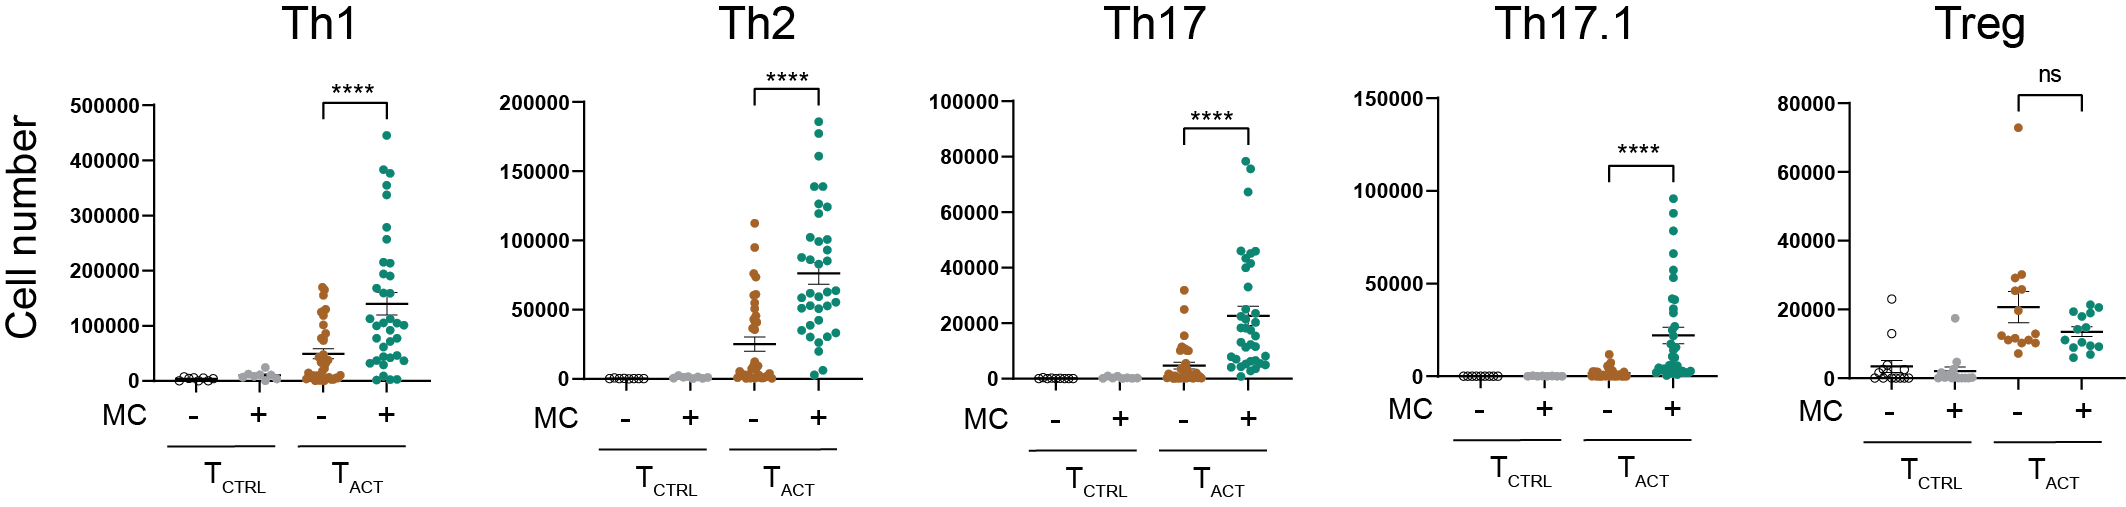
**

**Figure S1. Numbers of Teff subsets after 6 days of coculture.**

Freshly isolated memory CD4+ T cells from healthy blood donors were stimulated with anti-CD3/CD28 coated beads (TACT) or not (TCTRL) for 6 days in the presence or the absence of MCs. Cell number of each Teff subsets were measured by flow cytometry using counting beads. Each point represents a combination of MCs and memory CD4+ T cells originating from different healthy donors (n=36 for Th cells and n=14 for Tregs). Wilcoxon matched-pairs signed rank test, ****p < 0.0001, ns not significant.


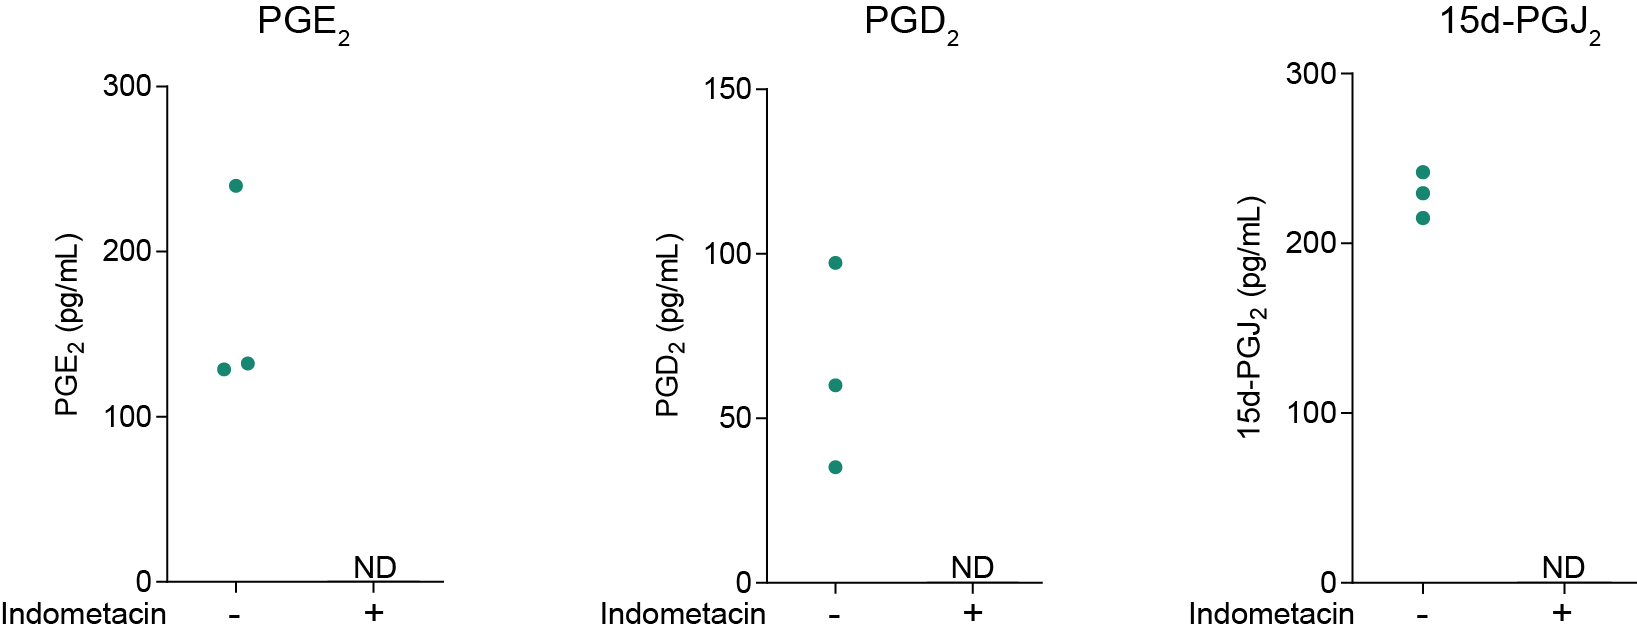


**Figure S2. Indometacin treatment abolishes eicosanoids production in MC / CD4+ T cell co-culture.**

MCs were co-cultured with effector/memory CD4+ T cells plus anti-CD3/28-coated beads for 48h with or without indometacin (100 µmol/L). Indicated eicosanoid concentrations were measured by LC-MS/MS. Each point represents one MC/T cell pair from different donors. ND, not detected.


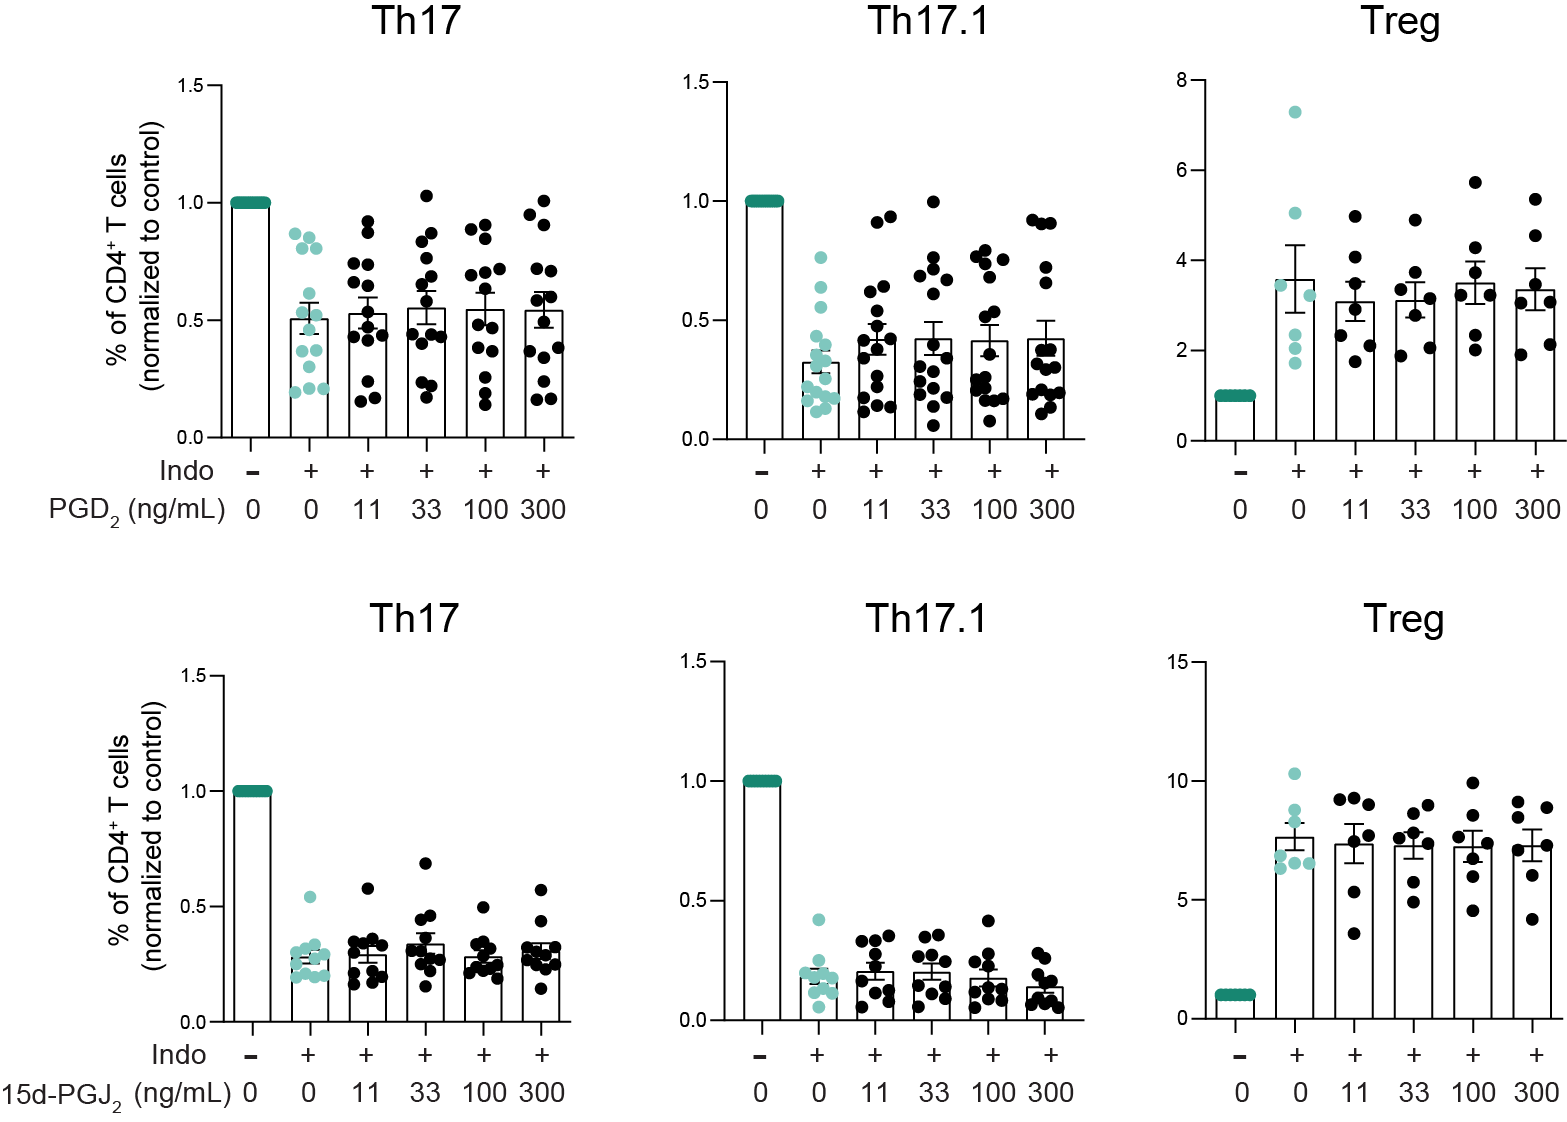


**Figure S3. PGD2 and 15d-PGJ2 do not impact TH17/Treg balance.**

Memory CD4+ T cells were co-cultured with MCs in the presence of anti-CD3/CD28 coated beads for 6 days. Indometacin-treated co-cultures were supplemented with increasing concentrations of PGD2 (upper panel) or 15d-PGJ2 (lower panel) and CD4+ T cell subset frequencies were analyzed by flow cytometry at day 6. Bars represent mean ± SEM (n=10-16). ANOVA showed no significant difference among groups.
